# Supplementary material for: Chiral uranium phosphonates constructed from achiral units with three-dimensional frameworks
Source: Royal Society of Chemistry journal article supplement (doi:10.1039/c2cc30519d), 2012-01-01
Supplement: c2cc30519d.pdf [file c2cc30519d.pdf]

**Table 1.** Selected Bond Valence Sum calculation for

$\text{UO}_2[\text{CH}_2(\text{PO}_3)_2] \cdot (\text{C}_2\text{H}_4\text{N}_2\text{H}_6)(\text{H}_2\text{O})$  (**UC1P2N-1**).

| Atom | Bond Distances (Å) |          | Bond Valence Sum | Valence Sum |
|------|--------------------|----------|------------------|-------------|
| O1   | O(1)-P(1)          | 1.511(7) | 1.29             | 1.29        |
| O2   | O(2)-U(1)          | 2.330(6) | 0.57             | 1.83        |
|      | O(2)-P(1)          | 1.518(6) | 1.26             |             |
| O3   | O(3)-U(1)          | 2.367(6) | 0.53             | 1.76        |
|      | O(3)-P(1)          | 1.529(6) | 1.22             |             |
| O4   | O(4)-U(1)          | 2.393(5) | 0.51             | 1.75        |
|      | O(4)-P(2)          | 1.524(6) | 1.24             |             |
| O5   | O(5)-U(1)          | 2.360(5) | 0.54             | 1.82        |
|      | O(5)-P(2)          | 1.513(6) | 1.28             |             |
| O6   | O(6)-U(1)          | 2.367(5) | 0.53             | 1.75        |
|      | O(6)-P(2)          | 1.531(5) | 1.22             |             |
| O7   | O(7)-U(1)          | 1.749(6) | 1.79             | 1.79        |
| O8   | O(8)-U(1)          | 1.772(6) | 1.71             | 1.71        |

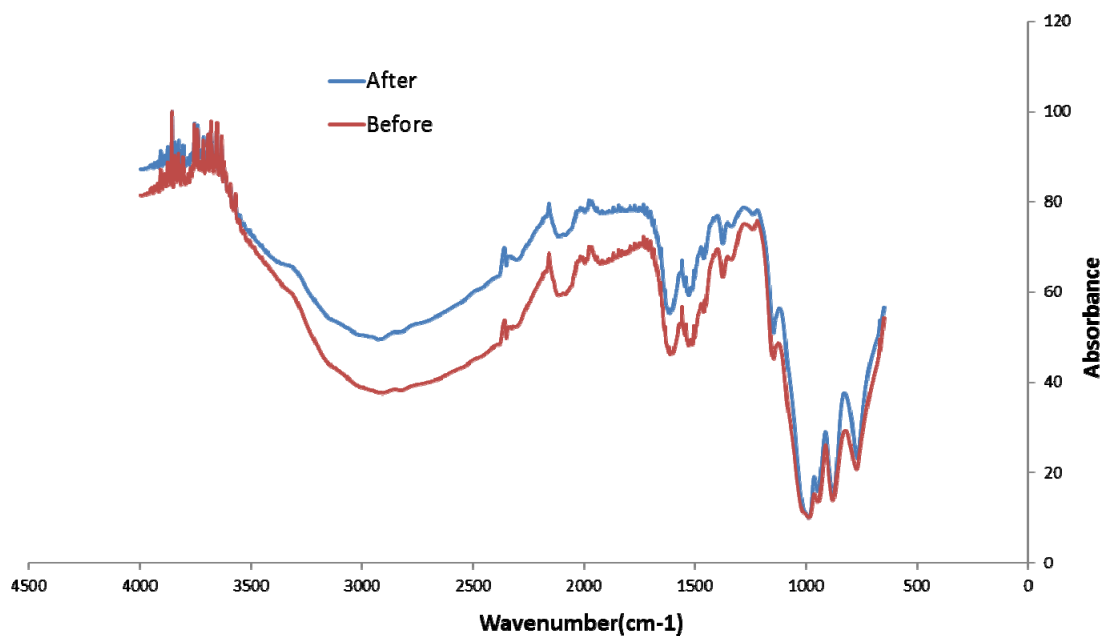

Figure S1. FT-IR spectrum of the  $\text{UO}_2[\text{CH}_2(\text{PO}_3)_2] \cdot (\text{C}_2\text{H}_4\text{N}_2\text{H}_6)(\text{H}_2\text{O})$  (UC1P2N-1) before and after the ion exchange, showing the peak of free water molecules at  $1650\text{cm}^{-1}$ .

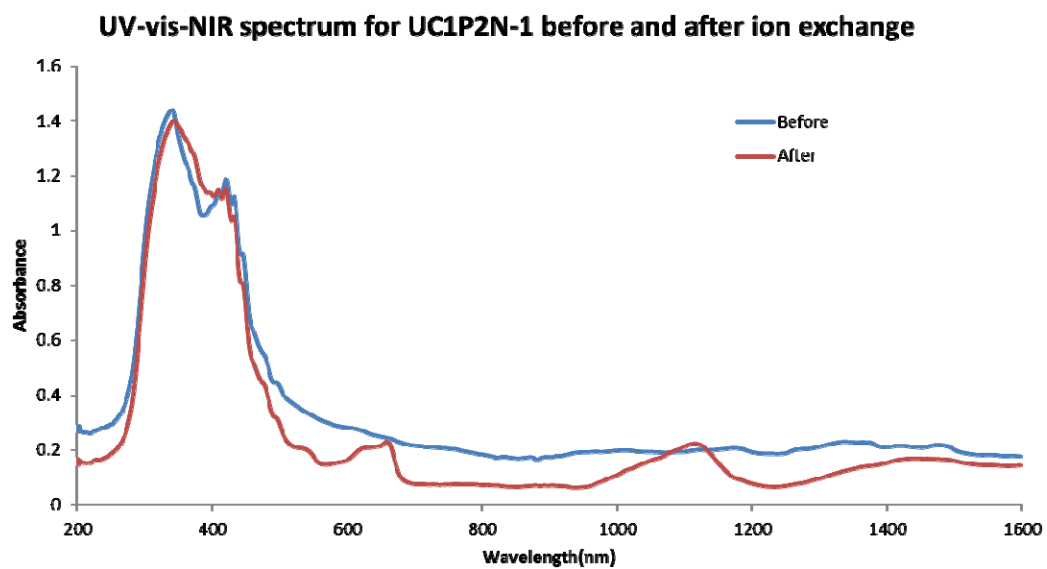

Figure S2: The UV-vis-NIR spectrum of UC1P2N-1 before and after the ion exchange with  $[\text{Co}(\text{en})_3]^{3+}$ , showing additional peaks after ion exchange.

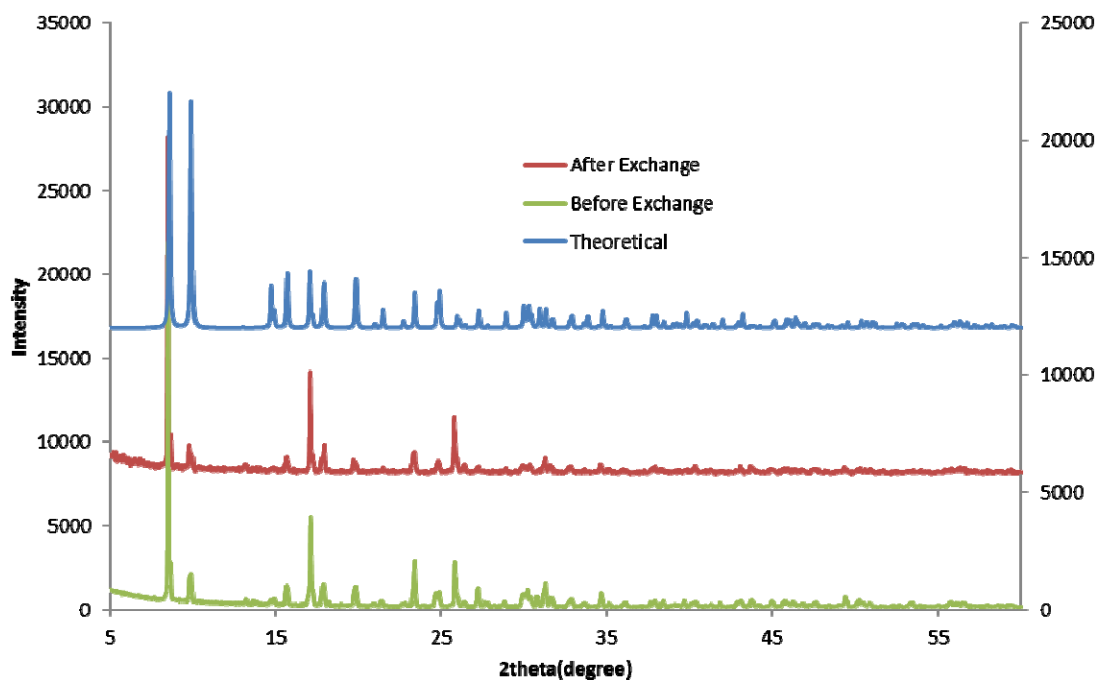

Figure S3. The powder X-ray diffraction pattern showing that the  $\text{UO}_2[\text{CH}_2(\text{PO}_3)_2] \cdot (\text{C}_2\text{H}_4\text{N}_2\text{H}_6)(\text{H}_2\text{O})$  (**UC1P2N-1**) is a pure sample and stable during the ion exchange process.

Table S2. EDS results showing the existence of Co in the crystal.

5/6/2011 3:35:50 PM

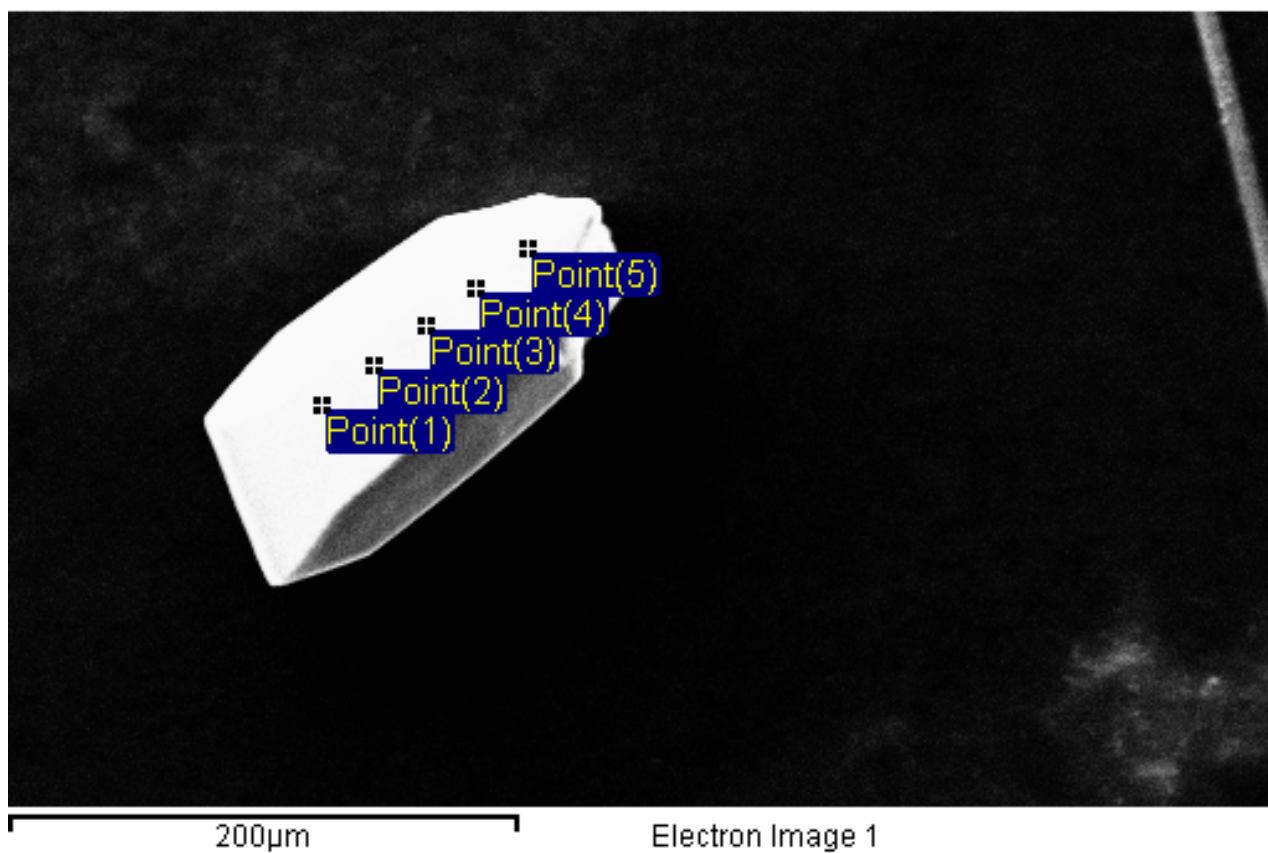

Processing option : All elements analysed (Normalised)

| Spectrum       | In stats. | P     | Co   | U     |
|----------------|-----------|-------|------|-------|
| Point(1)       | Yes       | 67.41 | 2.65 | 29.94 |
| Point(2)       | Yes       | 66.48 | 2.92 | 30.60 |
| Point(3)       | Yes       | 66.83 | 2.24 | 30.93 |
| Point(4)       | Yes       | 46.50 | 6.81 | 46.69 |
| Point(5)       | Yes       | 66.35 | 1.52 | 32.13 |
| Mean           |           | 62.71 | 3.23 | 34.06 |
| Std. deviation |           | 9.07  | 2.07 | 7.11  |
| Max.           |           | 67.41 | 6.81 | 46.69 |
| Min.           |           | 46.50 | 1.52 | 29.94 |

All results in atomic%
